# Supplementary material for: Highly efficient generation of bacterial leaf blight-resistant and transgene-free rice using a genome editing and multiplexed selection system
Source: PubMed Central journal article supplement (PMC8066475; doi:10.1186/s12870-021-02979-7), 2021-04-24
Supplement: 12870_2021_2979_MOESM3_ESM.pdf [file 12870_2021_2979_MOESM3_ESM.pdf]

**Highly efficient generation of bacterial leaf  
blight-resistant and transgene-free rice  
using a genome editing and multiplexed  
selection system**

**Kun Yu<sup>1</sup>, Zhiqiang Liu<sup>1</sup>, Huaping Gui<sup>1</sup>, Lizhao Geng<sup>1</sup>, Juan**

**Wei<sup>1</sup>, Dawei Liang<sup>1</sup>, Jian Lv<sup>1</sup>, Jianping Xu<sup>1</sup> & Xi Chen\***

**<sup>1</sup>Syngenta Biotechnology China Co. Ltd, 25 Life Science**

**Park Road, Beijing 102206, P.R. China**

**\*Xi.Chen@syngenta.com**

## Original gel picture of Xa13 gene expression determined by RT-PCR

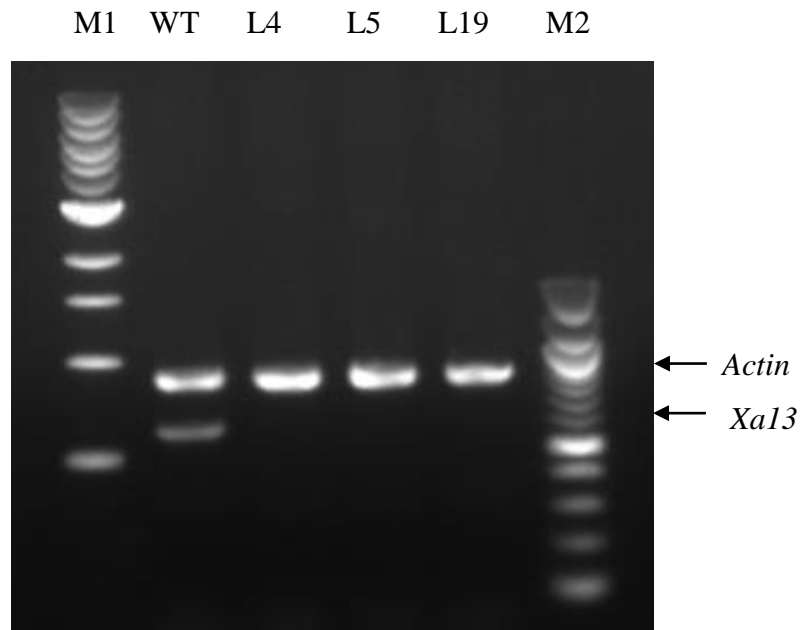

M1: 1 Kb ladder; M2: 100 bp ladder

**Supplementary Figure 1**
